# Supplementary material for: Deciphering the emission dynamics of colloidal PbS quantum dots: a spectroscopic exploration under diverse environmental and experimental conditions
Source: Royal Society of Chemistry journal article supplement (doi:10.1039/d4nr03842h), 2024-11-25
Supplement: d4nr03842h1.pdf [file d4nr03842h1.pdf]

## Electronic Supplementary Information

### Deciphering Emission Dynamics of Colloidal PbS Quantum Dots: A Spectroscopic Exploration under Diverse Environmental and Experimental Conditions

Michael Greben,\* Dmytro Vorontsov, Roman Dedic, Petro Khoroshyy, Lucie Ludvikova, and Jan Valenta

Corresponding authors: M. Greben (leibnits@gmail.com)

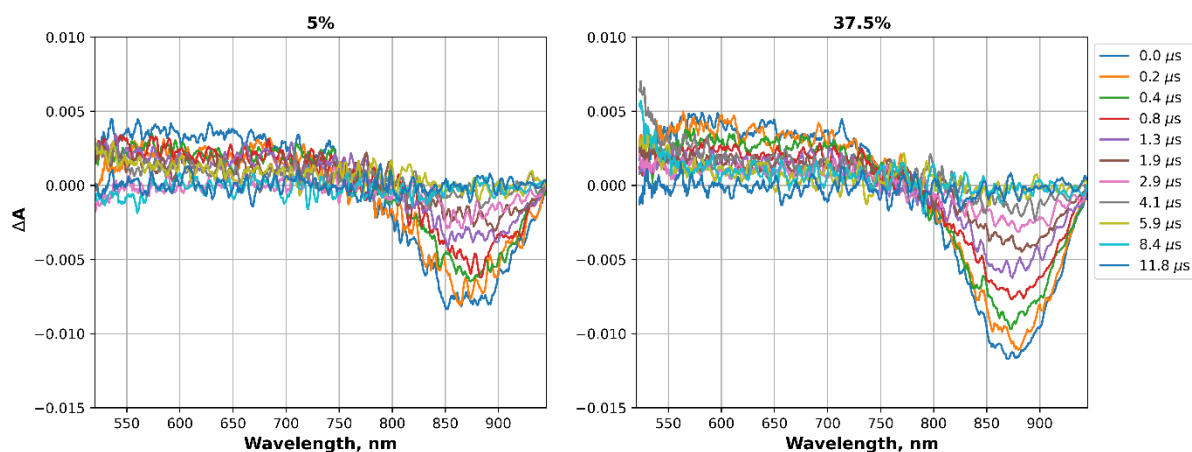

**Figure S1.** Selected transient absorption spectra, measured for samples 4.1 (5%), left, and 4.2 (37.5%), right.

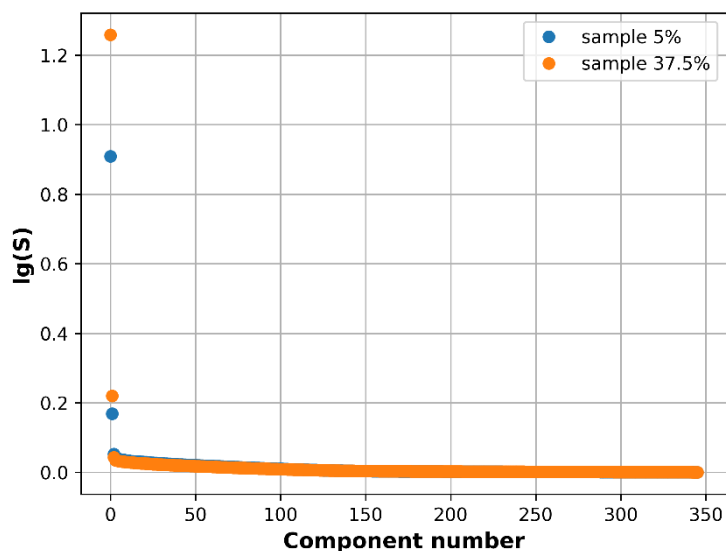

**Figure S2.** Singular values obtained from SVD analysis of transient absorption spectra of samples 4.1 (5%) and 4.2 (37.5%).

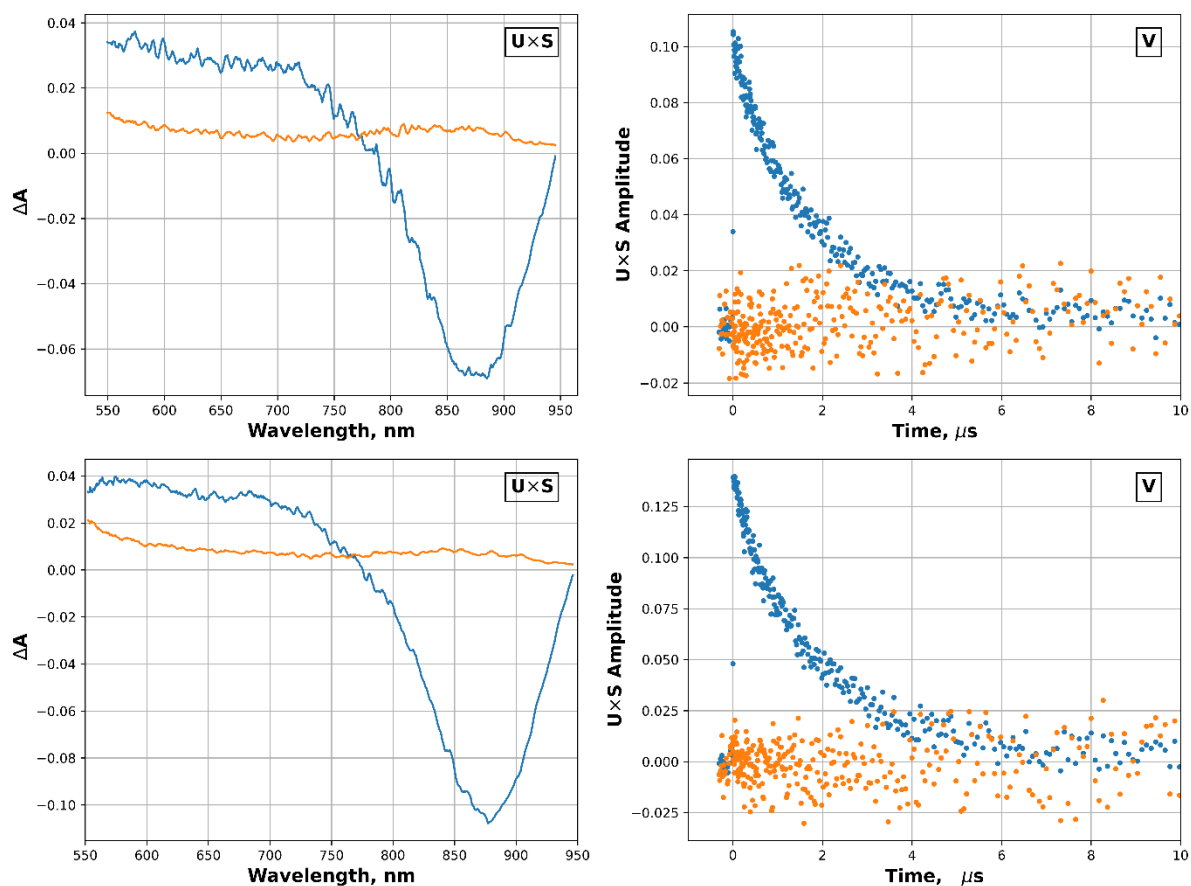

**Figure S3.** The first two significant left singular vectors (U) are shown in the left panels, each multiplied by their corresponding singular values (S). The right panels display the associated right singular vectors (V, the amplitude of the  $U \times S$  component over time). The top row illustrates results for sample 4.1 (5% concentration), while the bottom row shows data from sample 4.2 (37.5% concentration).
